# Supplementary material for: Correlation between Virtual Screening Performance and Binding Site Descriptors of Protein Targets
Source: Int J Med Chem. 2018 Jan 11;2018:3829307. doi: 10.1155/2018/3829307 (PMC5818911; doi:10.1155/2018/3829307)
Supplement: Supplementary Materials — contain a folder (configuration files) which includes the configuration files of the AutoDock Vina, a Microsoft Excel file (RMSD-redocking) which includes all of the RMSD obtained after redocking the cocrystal ligands in each corresponding target active site, and another Microsoft Excel file (rescoring-details) which includes detailed results of the rescoring study on each protein target. [file 3829307.f1.zip]

Archive with 37 entries (35 files):
- 3829307.f1/
- 3829307.f1/configuration files/
- 3829307.f1/configuration files/ada.txt
- 3829307.f1/configuration files/akt2.txt
- 3829307.f1/configuration files/comt.txt
- 3829307.f1/configuration files/cp2c9.txt
- 3829307.f1/configuration files/cxcr4.txt
- 3829307.f1/configuration files/def.txt
- 3829307.f1/configuration files/fa7.txt
- 3829307.f1/configuration files/fkb1a.txt
- 3829307.f1/configuration files/glcm.txt
- 3829307.f1/configuration files/grik1.txt
- 3829307.f1/configuration files/hsp90a.txt
- 3829307.f1/configuration files/hxk4.txt
- 3829307.f1/configuration files/inha.txt
- 3829307.f1/configuration files/kif11.txt
- 3829307.f1/configuration files/kith.txt
- 3829307.f1/configuration files/mapk2.txt
- 3829307.f1/configuration files/mcr.txt
- 3829307.f1/configuration files/mk01.txt
- 3829307.f1/configuration files/mk10.txt
- 3829307.f1/configuration files/nos1.txt
- 3829307.f1/configuration files/nram.txt
- 3829307.f1/configuration files/pa2ga.txt
- 3829307.f1/configuration files/plk1.txt
- 3829307.f1/configuration files/pur2.txt
- 3829307.f1/configuration files/pygm.txt
- 3829307.f1/configuration files/pyrd.txt
- 3829307.f1/configuration files/reni.txt
- 3829307.f1/configuration files/rock1.txt
- 3829307.f1/configuration files/sahh.txt
- 3829307.f1/configuration files/thb.txt
- 3829307.f1/configuration files/tysy.txt
- 3829307.f1/configuration files/wee1.txt
- 3829307.f1/configuration files/xiap.txt
- 3829307.f1/RMSD-redocking.xlsx
- 3829307.f1/Supplimentary-details.xlsx
