# Supplementary material for: Correlation between Virtual Screening Performance and Binding Site Descriptors of Protein Targets
Source: Int J Med Chem. 2018 Jan 11;2018:3829307. doi: 10.1155/2018/3829307 (PMC5818911; doi:10.1155/2018/3829307)
Supplement: Supplementary Materials — contain a folder (configuration files) which includes the configuration files of the AutoDock Vina, a Microsoft Excel file (RMSD-redocking) which includes all of the RMSD obtained after redocking the cocrystal ligands in each corresponding target active site, and another Microsoft Excel file (rescoring-details) which includes detailed results of the rescoring study on each protein target. [file 3829307.f1.zip › 3829307.f1/configuration files/pur2.txt]

receptor = receptor.pdbqt
num_modes = 1
exhaustiveness = 8
center_x =  74.746
center_y =  22.836
center_z =  31.243
size_x =  23
size_y =  23
size_z =  23
weight_gauss1 = -0.035579 
weight_gauss2 = -0.005156 
weight_repulsion = 0.840245 
weight_hydrophobic = -0.035069 
weight_hydrogen = -0.587439 
weight_rot = 0.05846
