# Supplementary material for: Correlation between Virtual Screening Performance and Binding Site Descriptors of Protein Targets
Source: Int J Med Chem. 2018 Jan 11;2018:3829307. doi: 10.1155/2018/3829307 (PMC5818911; doi:10.1155/2018/3829307)
Supplement: Supplementary Materials — contain a folder (configuration files) which includes the configuration files of the AutoDock Vina, a Microsoft Excel file (RMSD-redocking) which includes all of the RMSD obtained after redocking the cocrystal ligands in each corresponding target active site, and another Microsoft Excel file (rescoring-details) which includes detailed results of the rescoring study on each protein target. [file 3829307.f1.zip › 3829307.f1/RMSD-redocking.xlsx]

## Sheet: Sheet1
Target	RMSD
ada	6.31
akt2	0.92
comt	8.13
cp2c9	0.93
cxcr4	7.59
def	4.95
fa7	7.41
fkb1a	4.93
glcm	4.44
grik1	2.01
hsp90a	0.47
hxk4	1.71
inha	2.66
kif11	0.8
kith	0.47
mapk2	0.38
mcr	0.44
mk01	4.83
mk10	1.06
nos1	6.2
nram	0.93
pa2ga	2.02
plk1	1
pur2	1.17
pygm	0.56
pyrd	0.68
reni	1.98
rock1	7.42
sahh	0.51
thb	1.93
tysy	2.77
wee1	1.43
xiap	8.22
