# Supplementary material for: Correlation between Virtual Screening Performance and Binding Site Descriptors of Protein Targets
Source: Int J Med Chem. 2018 Jan 11;2018:3829307. doi: 10.1155/2018/3829307 (PMC5818911; doi:10.1155/2018/3829307)
Supplement: Supplementary Materials — contain a folder (configuration files) which includes the configuration files of the AutoDock Vina, a Microsoft Excel file (RMSD-redocking) which includes all of the RMSD obtained after redocking the cocrystal ligands in each corresponding target active site, and another Microsoft Excel file (rescoring-details) which includes detailed results of the rescoring study on each protein target. [file 3829307.f1.zip › 3829307.f1/Supplimentary-details.xlsx]

## Sheet: cxcr4
Scoring	AUC	EF20%	EF10%	EF2%	EF1%	EF0.2%	EF0.1%		Scoring	AUC	EF20%	EF10%	EF2%	EF1%	EF0.2%	EF0.1%
v	0.660771	1.29023	0.790667	0.158696	0	0	0		v - v	0	0	0	0	0	0	0
c	0.726185	2.75	3.75	5	5	0	0		c - v	0.065414	1.45977	2.95933	4.8413	5	0	0
d	0.603853	1.25	1	1.25	0	0	0		d -v	-0.0569179	-0.0402344	0.209333	1.0913	0	0	0
a	0.723172	2.875	4	5	7.5	0	0		a -v	0.0624009	1.58477	3.20933	4.8413	7.5	0	0
vcda	0.705637	2.375	2.75	5	5	0	0		vcda - v	0.0448657	1.08477	1.95933	4.8413	5	0	0
vcd	0.686935	2.125	2	5	2.5	0	0		vcd - v	0.0261634	0.834766	1.20933	4.8413	2.5	0	0
vda	0.684784	2.375	2	5	2.5	0	0		vda - v	0.0240128	1.08477	1.20933	4.8413	2.5	0	0
vca	0.729	2.625	3.25	5	2.5	0	0		vca - v	0.0682289	1.33477	2.45933	4.8413	2.5	0	0
cda	0.705549	2.5	3	5	5	0	0		cda - v	0.0447776	1.20977	2.20933	4.8413	5	0	0
vc	0.717994	2.375	3	2.5	0	0	0		vc - v	0.0572225	1.08477	2.20933	2.3413	0	0	0
vd	0.639937	1.25	1.25	1.25	0	0	0		vd - v	-0.0208346	-0.0402344	0.459333	1.0913	0	0	0
va	0.712129	2.5	2	1.25	2.5	0	0		va - v	0.0513579	1.20977	1.20933	1.0913	2.5	0	0
cd	0.681907	2.125	2.5	3.75	5	0	0		cd - v	0.0211355	0.834766	1.70933	3.5913	5	0	0
ca	0.73532	3	3.75	7.5	5	0	0		ca - v	0.0745486	1.70977	2.95933	7.3413	5	0	0
da	0.680909	2.25	2.5	4.9	7.5	0	0		da - v	0.0201373	0.959766	1.70933	4.7413	7.5	0	0
v = AutoDock Vina
c = ChemScore
d = DrugScore
a = AutoDock 4.2

## Sheet: glcm
Scoring	AUC	EF20%	EF10%	EF2%	EF1%	EF0.2%	EF0.1%		Scoring	AUC	EF20%	EF10%	EF2%	EF1%	EF0.2%	EF0.1%
v	0.485625	0.745716	0.345358	0	0	0	0		v - v	0	0	0	0	0	0	0
c	0.471493	1.2037	0.555556	0.925926	0	0	0		c - v	-0.0141314	0.457988	0.210197	0.925926	0	0	0
d	0.547644	1.38889	1.11111	0.925926	0	0	0		d -v	0.0620192	0.643173	0.765753	0.925926	0	0	0
a	0.540649	1.11111	1.11111	1.85185	0	0	0		a -v	0.0550242	0.365395	0.765753	1.85185	0	0	0
vcda	0.520381	1.01852	0.740741	0	0	0	0		vcda - v	0.0347557	0.272803	0.395382	0	0	0	0
vcd	0.5062	0.833333	0.37037	0	0	0	0		vcd - v	0.0205756	0.0876175	0.025012	0	0	0	0
vda	0.535896	0.925926	0.925926	0	0	0	0		vda - v	0.0502715	0.18021	0.580568	0	0	0	0
vca	0.50583	0.925926	0.740741	0	0	0	0		vca - v	0.0202051	0.18021	0.395382	0	0	0	0
cda	0.527834	0.925926	1.2963	0.925926	0	0	0		cda - v	0.042209	0.18021	0.950938	0.925926	0	0	0
vc	0.483914	0.925926	0.185185	0	0	0	0		vc - v	-0.00171098	0.18021	-0.160173	0	0	0	0
vd	0.516632	0.833333	0.740741	0	0	0	0		vd - v	0.0310072	0.0876175	0.395382	0	0	0	0
va	0.520429	0.925926	0.740741	0	0	0	0		va - v	0.0348045	0.18021	0.395382	0	0	0	0
cd	0.515477	0.648148	0.925926	0.925926	0	0	0		cd - v	0.0298519	-0.0975677	0.580568	0.925926	0	0	0
ca	0.506912	0.833333	1.11111	0.925926	0	0	0		ca - v	0.0212873	0.0876175	0.765753	0.925926	0	0	0
da	0.559211	1.01852	1.48148	0	0	0	0		da - v	0.0735866	0.272803	1.13612	0	0	0	0

## Sheet: hs90a
Scoring	AUC	EF20%	EF10%	EF2%	EF1%	EF0.2%	EF0.1%		Scoring	AUC	EF20%	EF10%	EF2%	EF1%	EF0.2%	EF0.1%
v	0.249535	0.113636	0	0	0	0	0		v - v	0	0	0	0	0	0	0
c	0.321217	0.227273	0.340909	0	0	0	0		c - v	0.0716826	0.113636	0.340909	0	0	0	0
d	0.393406	0.625	0.340909	0.568182	1.13636	5.68182	0		d -v	0.143871	0.511364	0.340909	0.568182	1.13636	5.68182	0
a	0.36948	0.511364	0.568182	0	0	0	0		a -v	0.119945	0.397727	0.568182	0	0	0	0
vcda	0.307752	0.170455	0.113636	0	0	0	0		vcda - v	0.0582177	0.0568182	0.113636	0	0	0	0
vcd	0.289581	0.113636	0	0	0	0	0		vcd - v	0.0400467	0	0	0	0	0	0
vda	0.295464	0.227273	0.113636	0	0	0	0		vda - v	0.0459292	0.113636	0.113636	0	0	0	0
vca	0.315823	0.170455	0.113636	0	0	0	0		vca - v	0.066288	0.0568182	0.113636	0	0	0	0
cda	0.345979	0.340909	0.227273	0	0	0	0		cda - v	0.0964447	0.227273	0.227273	0	0	0	0
vc	0.270297	0.113636	0	0	0	0	0		vc - v	0.0207618	0	0	0	0	0	0
vd	0.295546	0.0568182	0.113636	0	0	0	0		vd - v	0.0460114	-0.0568182	0.113636	0	0	0	0
va	0.293824	0.170455	0	0	0	0	0		va - v	0.0442896	0.0568182	0	0	0	0	0
cd	0.338409	0.170455	0.227273	0	0	0	0		cd - v	0.0888744	0.0568182	0.227273	0	0	0	0
ca	0.309515	0.284091	0.227273	0	0	0	0		ca - v	0.0599806	0.170455	0.227273	0	0	0	0
da	0.377721	0.397727	0.227273	0.568182	0	0	0		da - v	0.128186	0.284091	0.227273	0.568182	0	0	0

## Sheet: mk01
Scoring	AUC	EF20%	EF10%	EF2%	EF1%	EF0.2%	EF0.1%		Scoring	AUC	EF20%	EF10%	EF2%	EF1%	EF0.2%	EF0.1%
v	0.805735	3.38213	3.35211	2.16237	1.26582	0	0		v - v	0	0	0	0	0	0	0
c	0.766644	3.03797	3.29114	4.43038	6.32911	6.32911	0		c - v	-0.0390908	-0.344151	-0.0609756	2.26801	5.06329	6.32911	0
d	0.631902	1.4557	1.39241	2.53165	1.26582	0	0		d -v	-0.173832	-1.92643	-1.95971	0.369271	0	0	0
a	0.628654	1.26582	1.77215	0.632911	0	0	0		a -v	-0.17708	-2.1163	-1.57996	-1.52946	-1.26582	0	0
vcda	0.748464	2.40506	2.53165	1.26582	1.26582	0	0		vcda - v	-0.057271	-0.977062	-0.820469	-0.896552	0	0	0
vcd	0.776594	3.10127	2.91139	1.26582	1.26582	0	0		vcd - v	-0.0291406	-0.28086	-0.440722	-0.896552	0	0	0
vda	0.719153	2.1519	2.53165	1.26582	0	0	0		vda - v	-0.0865814	-1.23023	-0.820469	-0.896552	-1.26582	0	0
vca	0.773777	2.8481	2.91139	1.26582	1.26582	0	0		vca - v	-0.0319573	-0.534024	-0.440722	-0.896552	0	0	0
cda	0.702434	1.77215	2.27848	1.89873	2.53165	0	0		cda - v	-0.1033	-1.60997	-1.07363	-0.26364	1.26582	0	0
vc	0.816432	3.92405	4.13924	3.79747	2.53165	0	0		vc - v	0.0106974	0.541925	0.787126	1.63509	1.26582	0	0
vd	0.747445	2.46835	2.24051	1.89873	1.26582	0	0		vd - v	-0.0582896	-0.913771	-1.11161	-0.26364	0	0	0
va	0.747676	2.53165	2.40506	0	0	0	0		va - v	-0.0580586	-0.85048	-0.947052	-2.16237	-1.26582	0	0
cd	0.726379	2.34177	2.65823	2.53165	2.87342	0	0		cd - v	-0.0793561	-1.04035	-0.693887	0.369271	1.60759	0	0
ca	0.721282	2.1519	2.27848	2.53165	2.53165	0	0		ca - v	-0.0844522	-1.23023	-1.07363	0.369271	1.26582	0	0
da	0.639118	1.20253	1.89873	1.26582	1.26582	0	0		da - v	-0.166617	-2.17959	-1.45338	-0.896552	0	0	0

## Sheet: pur2
Scoring	AUC	EF20%	EF10%	EF2%	EF1%	EF0.2%	EF0.1%		Scoring	AUC	EF20%	EF10%	EF2%	EF1%	EF0.2%	EF0.1%
v	0.819499	3.03846	2.49415	1.81273	2	10	13.72		v - v	0	0	0	0	0	0	0
c	0.392747	0	0	0	0	0	0		c - v	-0.426752	-3.03846	-2.49415	-1.81273	-2	-10	-13.72
d	0.855924	3.4	4.8	7	8	10	20		d -v	0.0364254	0.361538	2.30585	5.18727	6	0	6.28
a	0.691021	2.1	2	4	0	0	0		a -v	-0.128478	-0.938462	-0.494154	2.18727	-2	-10	-13.72
vcda	0.748812	2.2	1.8	2	2	10	20		vcda - v	-0.0706867	-0.838462	-0.694154	0.187273	0	0	6.28
vcd	0.761656	2.5	1.8	2	4	10	14.88		vcd - v	-0.0578434	-0.538462	-0.694154	0.187273	2	0	1.16
vda	0.826986	3.2	4	4	6	10	20		vda - v	0.00748701	0.161538	1.50585	2.18727	4	0	6.28
vca	0.667461	1.3	0.8	0	0	0	0		vca - v	-0.152038	-1.73846	-1.69415	-1.81273	-2	-10	-13.72
cda	0.701656	2	1.6	2	2	0	0		cda - v	-0.117843	-1.03846	-0.894154	0.187273	0	-10	-13.72
vc	0.641433	0.5	0.4	0	0	0	0		vc - v	-0.178066	-2.53846	-2.09415	-1.81273	-2	-10	-13.72
vd	0.868641	4	4	6	6	20	20		vd - v	0.0491425	0.961538	1.50585	4.18727	4	10	6.28
va	0.776733	2.8	2	1	2	10	20		va - v	-0.0427654	-0.238462	-0.494154	-0.812727	0	0	6.28
cd	0.695976	1.98	1.4	2	2	0	0		cd - v	-0.123523	-1.05846	-1.09415	0.187273	0	-10	-13.72
ca	0.557394	0.7	0.4	0	0	0	0		ca - v	-0.262105	-2.33846	-2.09415	-1.81273	-2	-10	-13.72
da	0.801091	3	3.8	6	8	10	20		da - v	-0.0184076	-0.0384615	1.30585	4.18727	6	0	6.28

## Sheet: pygm
Scoring	AUC	EF20%	EF10%	EF2%	EF1%	EF0.2%	EF0.1%		Scoring	AUC	EF20%	EF10%	EF2%	EF1%	EF0.2%	EF0.1%
v	0.593615	1.54292	1.52776	0.761207	1.2987	0	0		v - v	0	0	0	0	0	0	0
c	0.596926	1.68831	1.03896	1.94805	0	0	0		c - v	0.00331103	0.145391	-0.488799	1.18685	-1.2987	0	0
d	0.560963	1.49351	1.68831	2.5974	3.8961	0	0		d -v	-0.0326521	-0.049414	0.160552	1.8362	2.5974	0	0
a	0.445598	0.779221	1.2987	0.649351	0	0	0		a -v	-0.148017	-0.7637	-0.229058	-0.111856	-1.2987	0	0
vcda	0.560683	1.1039	1.68831	1.94805	1.2987	0	0		vcda - v	-0.0329323	-0.439024	0.160552	1.18685	0	0	0
vcd	0.597122	1.2987	1.81818	1.94805	0	0	0		vcd - v	0.00350715	-0.244219	0.290422	1.18685	-1.2987	0	0
vda	0.543114	0.974026	1.55844	1.2987	0	0	0		vda - v	-0.050501	-0.568895	0.0306818	0.537495	-1.2987	0	0
vca	0.55476	1.03896	1.42857	0	0	0	0		vca - v	-0.0388556	-0.503959	-0.0991883	-0.761207	-1.2987	0	0
cda	0.539736	1.1039	1.2987	2.5974	3.8961	0	0		cda - v	-0.0538796	-0.439024	-0.229058	1.8362	2.5974	0	0
vc	0.60765	1.23377	1.42857	0.649351	1.2987	0	0		vc - v	0.0140352	-0.309154	-0.0991883	-0.111856	0	0	0
vd	0.583423	1.49351	1.94805	0.87013	0	0	0		vd - v	-0.0101918	-0.049414	0.420292	0.108923	-1.2987	0	0
va	0.530401	0.909091	1.42857	0	0	0	0		va - v	-0.0632145	-0.63383	-0.0991883	-0.761207	-1.2987	0	0
cd	0.588427	1.55844	1.42857	2.5974	3.8961	0	0		cd - v	-0.00518821	0.0155211	-0.0991883	1.8362	2.5974	0	0
ca	0.522348	1.03896	1.2987	1.2987	1.2987	0	0		ca - v	-0.0712671	-0.503959	-0.229058	0.537495	0	0	0
da	0.5018	0.974026	1.2987	2.5974	3.8961	0	0		da - v	-0.0918155	-0.568895	-0.229058	1.8362	2.5974	0	0

## Sheet: ada
Scoring	AUC	EF20%	EF10%	EF2%	EF1%	EF0.2%	EF0.1%		Scoring	AUC	EF20%	EF10%	EF2%	EF1%	EF0.2%	EF0.1%
v	0.519637	1.6129	1.41657	0.537634	1.07527	0	0		v - v	0	0	0	0	0	0	0
c	0.377417	1.02151	0.967742	0	0	0	0		c - v	-0.14222	-0.591398	-0.448825	-0.537634	-1.07527	0	0
d	0.499609	1.39785	1.82796	1.6129	2.15054	5.37634	0		d -v	-0.020028	-0.215054	0.41139	1.07527	1.07527	5.37634	0
a	0.43481	1.1828	1.29032	0.537634	0	0	0		a -v	-0.0848265	-0.430108	-0.126245	0	-1.07527	0	0
vcda	0.438269	1.1828	1.82796	0.537634	0	0	0		vcda - v	-0.0813681	-0.430108	0.41139	0	-1.07527	0	0
vcd	0.444459	1.29032	1.82796	0.537634	0	0	0		vcd - v	-0.075178	-0.322581	0.41139	0	-1.07527	0	0
vda	0.478896	1.1828	1.82796	0	0	0	0		vda - v	-0.0407413	-0.430108	0.41139	-0.537634	-1.07527	0	0
vca	0.427548	1.12903	1.50538	0	0	0	0		vca - v	-0.0920892	-0.483871	0.0888092	-0.537634	-1.07527	0	0
cda	0.416536	1.23656	1.82796	0.537634	0.397849	0	0		cda - v	-0.103101	-0.376344	0.41139	0	-0.677419	0	0
vc	0.430086	1.12903	1.50538	0.537634	0	0	0		vc - v	-0.0895511	-0.483871	0.0888092	0	-1.07527	0	0
vd	0.508801	1.29032	1.93548	1.47312	0	0	0		vd - v	-0.0108356	-0.322581	0.518917	0.935484	-1.07527	0	0
va	0.474106	1.23656	1.6129	0.537634	0	0	0		va - v	-0.045531	-0.376344	0.196336	0	-1.07527	0	0
cd	0.416122	1.23656	1.82796	1.07527	1.07527	0	0		cd - v	-0.103515	-0.376344	0.41139	0.537634	0	0	0
ca	0.395353	1.12903	1.1828	0.537634	0	0	0		ca - v	-0.124284	-0.483871	-0.233771	0	-1.07527	0	0
da	0.459132	1.29032	1.82796	1.07527	1.07527	0	0		da - v	-0.0605046	-0.322581	0.41139	0.537634	0	0	0

## Sheet: akt2
Scoring	AUC	EF20%	EF10%	EF2%	EF1%	EF0.2%	EF0.1%		Scoring	AUC	EF20%	EF10%	EF2%	EF1%	EF0.2%	EF0.1%
v	0.777975	2.99427	4.92264	13.2979	18.851	23.3	25.8922		v - v	0	0	0	0	0	0	0
c	0.744253	2.62931	3.7931	7.32759	10.3448	12.9612	17.2414		c - v	-0.0337215	-0.364961	-1.12954	-5.97034	-8.50616	-10.3388	-8.65086
d	0.6993	2.41379	3.96552	8.62069	11.2371	17.2414	17.2716		d -v	-0.0786752	-0.580478	-0.957121	-4.67724	-7.61392	-6.05862	-8.62069
a	0.803084	3.23276	5	14.2241	19.8578	28.0474	25.8922		a -v	0.025109	0.238487	0.0773613	0.926207	1.00677	4.74741	0
vcda	0.801021	3.14655	5.25862	15.5172	20.7198	30.2026	30.2026		vcda - v	0.0230461	0.15228	0.335982	2.21931	1.86884	6.90259	4.31034
vcd	0.788325	2.97414	5	13.7931	19.8276	25.8922	30.2026		vcd - v	0.0103496	-0.0201335	0.0773613	0.495172	0.976601	2.59224	4.31034
vda	0.809902	3.23276	5.86207	16.8103	23.2759	30.2026	30.2026		vda - v	0.031927	0.238487	0.93943	3.51241	4.42488	6.90259	4.31034
vca	0.794233	3.06034	4.82759	14.2241	18.9655	30.2026	30.2026		vca - v	0.0162581	0.0660734	-0.0950525	0.926207	0.114532	6.90259	4.31034
cda	0.794557	3.10345	5	15.5172	18.1336	28.0474	25.8922		cda - v	0.0165821	0.109177	0.0773613	2.21931	-0.717365	4.74741	0
vc	0.775588	2.93103	4.48276	12.931	17.2414	25.8922	25.8922		vc - v	-0.00238692	-0.0632369	-0.43988	-0.366897	-1.60961	2.59224	0
vd	0.786494	2.93103	4.56897	14.0388	18.9957	25.8922	30.2026		vd - v	0.00851936	-0.0632369	-0.353673	0.740862	0.144704	2.59224	4.31034
va	0.805669	3.28448	5.08621	15.0862	22.4138	30.2026	30.2026		va - v	0.0276935	0.290211	0.163568	1.78828	3.56281	6.90259	4.31034
cd	0.765152	2.80172	4.13793	12.5	15.9784	21.5819	21.5819		cd - v	-0.0128228	-0.192547	-0.784708	-0.797931	-2.87254	-1.7181	-4.31034
ca	0.784869	3.06034	4.65517	12.069	16.4095	25.8621	25.8621		ca - v	0.0068943	0.0660734	-0.267466	-1.22897	-2.4415	2.56207	-0.0301724
da	0.799292	3.18966	5.08621	16.3793	22.4138	28.0474	25.8922		da - v	0.0213172	0.195384	0.163568	3.08138	3.56281	4.74741	0

## Sheet: comt
Scoring	AUC	EF20%	EF10%	EF2%	EF1%	EF0.2%	EF0.1%		Scoring	AUC	EF20%	EF10%	EF2%	EF1%	EF0.2%	EF0.1%
v	0.525021	1.24515	0.89508	1.21951	0	0	0		v - v	0	0	0	0	0	0	0
c	0.371241	0.731707	0.731707	0	0	0	0		c - v	-0.15378	-0.513446	-0.163373	-1.21951	0	0	0
d	0.362537	0.243902	0.243902	0	0	0	0		d -v	-0.162484	-1.00125	-0.651177	-1.21951	0	0	0
a	0.735718	0.97561	0.731707	2.43902	4.87805	12.1951	24.3902		a -v	0.210697	-0.269543	-0.163373	1.21951	4.87805	12.1951	24.3902
vcda	0.575187	1.34146	1.21951	1.21951	0	0	0		vcda - v	0.0501662	0.0963102	0.324432	0	0	0	0
vcd	0.39793	0.609756	0.487805	0	0	0	0		vcd - v	-0.127091	-0.635397	-0.407275	-1.21951	0	0	0
vda	0.644794	1.58537	0.243902	1.21951	2.43902	12.1951	0		vda - v	0.119773	0.340213	-0.651177	0	2.43902	12.1951	0
vca	0.646253	1.46341	1.46341	1.21951	2.43902	0	0		vca - v	0.121231	0.218261	0.568335	0	2.43902	0	0
cda	0.592868	0.97561	0.97561	1.21951	0	0	0		cda - v	0.0678469	-0.269543	0.0805299	0	0	0	0
vc	0.430837	1.21951	1.21951	0	0	0	0		vc - v	-0.094184	-0.025641	0.324432	-1.21951	0	0	0
vd	0.439269	0.365854	0.487805	0	0	0	0		vd - v	-0.0857527	-0.8793	-0.407275	-1.21951	0	0	0
va	0.749559	1.58537	0.97561	1.21951	2.43902	12.1951	24.3902		va - v	0.224538	0.340213	0.0805299	0	2.43902	12.1951	24.3902
cd	0.340106	0.365854	0.243902	0	0	0	0		cd - v	-0.184915	-0.8793	-0.651177	-1.21951	0	0	0
ca	0.68793	1.46341	1.21951	1.21951	0	0	0		ca - v	0.162909	0.218261	0.324432	0	0	0	0
da	0.690239	0.853659	0.487805	1.21951	2.43902	12.1951	0		da - v	0.165218	-0.391495	-0.407275	0	2.43902	12.1951	0

## Sheet: def
Scoring	AUC	EF20%	EF10%	EF2%	EF1%	EF0.2%	EF0.1%		Scoring	AUC	EF20%	EF10%	EF2%	EF1%	EF0.2%	EF0.1%
v	0.541169	1.31066	1.52903	0.396261	0	0	0		v - v	0	0	0	0	0	0	0
c	0.262277	0.245098	0.196078	0	0	0	0		c - v	-0.278892	-1.06556	-1.33295	-0.396261	0	0	0
d	0.631811	1.42157	1.47059	3.43137	1.96078	0	0		d -v	0.0906414	0.110907	-0.0584416	3.03511	1.96078	0	0
a	0.577991	1.86275	1.86275	2.94118	2.94118	4.90196	0		a -v	0.0368216	0.552083	0.333715	2.54492	2.94118	4.90196	0
vcda	0.50154	1.17647	0.784314	0.980392	0.980392	2.82353	0		vcda - v	-0.0396295	-0.134191	-0.744716	0.584131	0.980392	2.82353	0
vcd	0.465078	0.882353	0.392157	0.490196	0.980392	0	0		vcd - v	-0.0760916	-0.428309	-1.13687	0.0939352	0.980392	0	0
vda	0.601582	1.47059	1.76471	0.980392	1.96078	4.90196	7.72549		vda - v	0.0604133	0.159926	0.235676	0.584131	1.96078	4.90196	7.72549
vca	0.456027	0.833333	0.862745	0.490196	0.980392	0	0		vca - v	-0.085142	-0.477328	-0.666285	0.0939352	0.980392	0	0
cda	0.485449	1.07843	0.784314	1.47059	1.96078	4.90196	0		cda - v	-0.0557199	-0.23223	-0.744716	1.07433	1.96078	4.90196	0
vc	0.384306	0.539216	0.490196	0	0	0	0		vc - v	-0.156863	-0.771446	-1.03883	-0.396261	0	0	0
vd	0.601855	1.32353	1.47059	0.490196	0.980392	0	0		vd - v	0.0606857	0.0128676	-0.0584416	0.0939352	0.980392	0	0
va	0.568945	1.47059	1.66667	1.96078	0.980392	0	0		va - v	0.0277755	0.159926	0.137637	1.56452	0.980392	0	0
cd	0.426572	0.784314	0.392157	0.980392	0.980392	0	0		cd - v	-0.114597	-0.526348	-1.13687	0.584131	0.980392	0	0
ca	0.415334	0.637255	0.490196	0.980392	0.980392	0	0		ca - v	-0.125835	-0.673407	-1.03883	0.584131	0.980392	0	0
da	0.621121	1.51961	2.05882	1.96078	2.94118	9.80392	9.80392		da - v	0.0799521	0.208946	0.529794	1.56452	2.94118	9.80392	9.80392

[truncated: 25 more sheets: cp2c9, fa7, fab4, fak1, fkb1a, grik1, hx4, inha, kif11, kith, mapk2, mcr, mk10, nos1, nram, pa2ga, plk1, pyrd, reni, rock1 …]
